# Supplementary material for: The Burden of Disease in Metachromatic Leukodystrophy: Results of a Caregiver Survey in the UK and Republic of Ireland.
Source: Research Square preprint supplement (doi:10.21203/rs.3.rs-2271864/v1), 2023-05-04
Supplement: Supplementary file 1 [file b4dff375476881df35062d15.docx]

**Supplementary Tables**

**Supplementary Table 1. Overall symptom burden in untreated patients: Late infantile and early juvenile.**

| **Overall symptom burden**  **Frequency, n (%)** | **Late infantile**  **(N=10)** | **Early juvenile**  **(N=3)** |
| --- | --- | --- |
| Mobility  Wheelchair dependent or immobile  Walking with aids  Some issues with walking  No mobility issues | 10 (100)a  0  0  0 | 3 (100)  0  0  0 |
| Learning  Unable to attend school  Attend specialist school  Attend specialist school outreach  Homeschooled  Mainstream school | 2 (29)b  2 (28)b  1 (14)b  2 (29)b  0 | 0  3 (100)  0  0  0 |
| Speech and communication  Lost all communication  Lost ability to speak  Speech deterioration  No speech issues reported | 0  8 (80)  0  2 (20) | 3 (100)  0  0  0 |
| Musculoskeletal  Dystonia  Hip subluxation or dislocation  Hypotonia  Scoliosis  Spasticity or hypertonia  No musculoskeletal issues | 8 (80)  4 (40)  6 (60)  4 (40)  8 (80)  2 (20) | 3 (100)  2 (67)  3 (100)  3 (100)  3 (100)  0 |
| Eyesight and hearing  Blindness  Vision difficulties  Deafness  No issues with eyesight or hearing | 3 (30)  3 (30)  2 (20)  3 (30) | 3 (100)  0  0  0 |
| Neurological symptoms  Anxiety or panic  Temperature dysregulation  Peripheral neuropathy  Seizuresc  Sensory processing issues  Sleep disturbance  Uncontrollable crying  No neurological symptoms | 6 (60)  5 (50)  3 (30)  8 (80)  4 (40)  5 (50)  5 (50)  2 (20) | 2 (67)  3 (100)  2 (67)  2 (67)  2 (67)  2 (67)  1 (33)  0 |
| Nutrition and eating  Fed by nasogastric tube  Fed by gastronomy tube  Gall bladder issues  No feeding or gallbladder issues | 1 (10)  9 (90)  0  0 | 0  3 (100)  2 (67)  0 |
| Chest and respiratory symptoms  Aspiration  Excess secretionsd  Frequent chest infections  Frequent colds or runny nose  Ventilation (CPAP or BI PAP)  No chest or respiratory symptoms | 5 (50)  8 (80)  3 (30)  3 (30)  1 (10)  1(10) | 3 (100)  3 (100)  3 (100)  2 (67)  0  0 |
| Bowels and bladder  Constipation  Urinary retention  Urinary and bowel incontinence  Urinary incontinence only  No bowel or bladder issues | 7 (70)  6 (60)  5 (50)  5 (50)  3 (30) | 3 (100)  1 (33)  3 (100)  0  0 |

*CPAP: continuous positive airway pressure; BI PAP: Bilevel Positive Airway Pressure.*

a Includes one patient where respondent answered ‘no mobility issues’ but later in the questionnaire referred to parents having bad backs due to lifting and moving child, having a bathroom adapted and using a wheelchair or specialist buggy.

b Total number of 7 live school-aged children.

c Suffering from seizures or are on anti-seizure medication.

d Suffering from excess secretions or are on anti-secretion medication.

**Supplementary Table 2. Overall symptom burden in untreated patients: Late juvenile and adult onset.**

| **Overall symptom burden**  **Frequency, n (%)** | **Late juvenile**  **(N=2)** | **Adult onset**  **(N=2)** |
| --- | --- | --- |
| Mobility  Wheelchair dependent or immobile  Some issues with walking  No mobility issues | 2 (100)  0  0 | 1 (50)  1 (50)  0 |
| Learning (cognitive symptoms)  Learning issues  Memory and concentration issues  Confusion or disorientation  Dementia  No cognitive symptoms | 2 (100)  2 (100)  2 (100)  1 (50)  0 | 2 (100)  2 (100)  2 (100)  1 (50)  0 |
| Speech and communication  Dysarthria  Dysphasia  Lost all communication  Lost ability to speak  Speech deterioration  No issues with speech | 1 (50)  1 (50)  1 (50)  1 (50)  1 (50)  0 | 0  2 (100)  2 (100)  2 (100)  0  0 |
| Musculoskeletal  Dystonia  Hip subluxation or dislocation  Hypotonia  Scoliosis  Spasticity or hypertonia  No musculoskeletal issues | 2 (100)  1 (50)  1 (50)  1 (50)  2 (100)  0 | 1 (50)  1 (50)  1 (50)  1 (50)  1 (50)  1 (50) |
| Eyesight and hearing  Blindness  Deafness  No issues with eyesight or hearing | 1 (50)  0  1 (50) | 1 (50)  1 (50)  1 (50) |
| Neurological symptoms  Anxiety or panic  Temperature dysregulation  Peripheral neuropathy  Seizures or epilepsy  Sensory processing issuesa  Sleep disturbance  Uncontrollable crying  No neurological symptoms | 1 (50)  1 (50)  2 (100)  1 (50)  2 (100)  2 (100)  1 (50)  0 | 1 (50)  1 (50)  2 (100)  2 (100)  1 (50)  1 (50)  2 (100)  0 |
| Nutrition and eating  Difficulty swallowing/risk of choking  Fed by nasogastric tube  Gall bladder issues  No feeding or gallbladder issues | 0  1 (50)  0  1 (50) | 1 (50)  1 (50)  1 (50)  0 |
| Chest and respiratory symptoms  Aspiration  Excess secretions  Frequent chest infections  Frequent colds or runny nose  No chest or respiratory symptoms | 1 (50)  1 (50)  1 (50)  1 (50)  1 (50) | 0  0  0  0  0 |
| Bowels and bladder  Urgency/frequent accidents  Constipation  Urinary retention  Urinary incontinence  Urinary and bowel incontinence  No issues with bowels and bladder | 0  1 (50)  1 (50)  0  1 (50)  1 (50) | 1 (50)  0  1 (50)  1 (50)  0  1 (50) |

a Including light sensitivity.

**Supplementary Table 3. Mean number of hospital visits or stays connected to MLD in the last 12 months in untreated patients.**

| **Mean number of hospital visits or stays** | **Late  infantile (N=8)a** | **Early juvenile**  **(N=3)** | **Late  juvenile (N=2)** | **Adult  onset**  **(N=2)** |
| --- | --- | --- | --- | --- |
| Number of hospital outpatient visits | 18 | 14 | 3 | 1 |
| Number of hospitalisations | 3 | 1 | 0.5b | 0 |
| Total length of stay in hospital (days) | 15 | 11 | 0.5b | 0 |

a Number of live patients.

b One patient was hospitalised for one day.

**Supplementary Table 4. Medications, interventions, and surgery required for MLD management in untreated patients.**

| **Medicines, interventions, and surgeries**  **Frequency, n (%)** | **Late  infantile (N=10)** | **Early juvenile**  **(N=3)** | **Late  juvenile (N=2)** | **Adult  onset**  **(N=1)a** |
| --- | --- | --- | --- | --- |
| Medicines  Patients requiring medicines  Anti-secretion medication  Anti-seizure medication  Medicine to manage digestive issues  Muscle relaxants for spasms  Pain medication  Other | 8 (100)b  7 (88)b  6 (75)b  5 (63)b  7 (88)b  7 (88)b  1 (13)b,c | 3 (100)  3 (100)  2 (67)  3 (100)  3 (100)  3 (100)  0 | 2 (100)  1 (50)  1 (50)  2 (100)  2 (100)  1 (50)  0 | 1 (100)  0  1 (100)  0  0  0  1 (100)d |
| Medical interventions  Patients requiring interventions  CPAP or BI PAP  Brace for scoliosis  Enemas for constipation  Suctioning  Urinary catheter  Other | 7 (88)b  1 (13)b  0b  2 (25)b  6 (75)b  3 (38)b  1 (13)b,e | 2 (67)  0  1 (33)  1 (33)  2 (67)  1 (33)  1 (33)f | 0  0  0  0  1 (50)  1 (50)  0 | 0  0  0  0  0  0  0 |
| Surgeries  Patients requiring surgeries  Gall bladder removal  Gastronomy tube  Surgery for hip dislocation  Other | 9 (90)  2 (20)  9 (90)  1 (10)  1 (10)g | 3 (100)  0  3 (100)  0  1 (33)h | 2 (67)  1 (33)  0  0  1 (33)i | 0  0  1 (100)  0  0 |

a One respondent did not answer this question.

b Total number of 8 live patients.

c Clonidine and clonazepam.

d Patient receives desmopressin (vasopressin analogue) and mirtazapine (anti-depressant).

e Nebuliser, splints, and oxygen.

f Ankle/foot orthoses.

g Tendons in ankles cut.

h Tendon repair to facilitate weight bearing.

i One patient had surgery for scoliosis.

**Supplementary Table 5. Care burden in untreated patients.**

| **Care burden**  **Frequency, n (%)** | **Late  infantile (N=10)** | **Early juvenile**  **(N=3)** | **Late  juvenile (N=2)** | **Adult  onset**  **(N=2)** |
| --- | --- | --- | --- | --- |
| Family care  Care by mothers  Care by fathers  Care by other family member | 10 (100)a  5 (50)a  2 (20)a | 3 (100)b  3 (100)c  0 | 2 (100)  1 (50)  0 | 0  0  0 |
| Additional care  Professional carer  Social worker  Play worker  Occupational therapist  Physiotherapist  NHS Continuing Health team  Residential care  Weekend carer  Night-time support  Hospice  Respite care  No support needed  Refused support | 6 (80)d  3 (40)d  0  0  0  0  0  0  0  0f  6 (70)d  2 (30)d  1 (10)d  1 (10)d | 2 (67)  3 (100)  0  0  0  0  0  0  0  1 (33)  0  0  0  0 | 2 (100)  2 (100)  2 (100)  1 (50)  1 (50)  1 (50)  1 (50)  0  0  0  0  0  0  0 | 2 (100)  1 (50)  0  0  0  0  0  2 (100)e  0  0  0  1 (50)  0  0 |
| Benefits claimed  Carers allowance  Child tax credit  Disability living allowance  Employment support  Housing benefit  Universal credit  Working tax credit  Council tax benefit  Residential care package  Personal independence payment | 7 (90)  6 (80)  4 (50)  7 (90)  1 (10)  2 (20)  2 (20)  2 (20)  0  0  0 | 3 (100)  2 (67)  1 (33)  3 (100)  0  1 (33)  0  0  0  0  0 | 2 (100)  1 (50)  0  1 (50)  1 (50)  0  0  0  1 (50)  1 (50)  1 (50) | 2 (100)  2 (100)  0  1 (50)  1 (50)  0  0  0  0  1 (50)  1 (50) |

a Over 100 hours of childcare per week.

b Mothers spent between 40-88 hours per week of childcare per week.

c Fathers spent between 20-88 hours per week of childcare per week.

d Total number of 8 patients without treatment.

e The live patient was cared for at home for two years before moving to residential care and the deceased patient was in residential care.

**Supplementary Table 6. Home adaptations and equipment in untreated patients.**

| **Home adaptations and equipment required**  **Frequency, n (%)** | **Late  infantile (N=10)** | **Early juvenile**  **(N=3)** | **Late  juvenile (N=2)** | **Adult  onset**  **(N=2)** |
| --- | --- | --- | --- | --- |
| Home adaptations needed | 8 (80) | 3 (100) | 2 (100) | 0 |
| Equipment needed | 10 (100) | 3 (100) | 0 | 0 |
| Bathroom  Bathroom adaptation  Bath chair  Toileting chair | 4 (40)  9 (90)  1 (10) | 2 (67)  3 (100)  0 | 1 (50)  0  0 | 0  0  0 |
| Bedroom  Bedroom adaptation  Medical bed  Sleep system | 2 (20)  8 (80)  7 (70) | 2 (67)  3 (100)  3 (100) | 1 (50)  0  0 | 0  0  0 |
| General home  Home extension  Hoist installed  Specialist seating  Lift installed  Moved to suitable accommodation  Access adaptation  Other | 1 (10)  2 (20)  9 (90)  1 (10)  3 (30)  0  2 (20)b | 2 (67)  3 (100)  3 (100)  2 (67)  0  0  1 (33)c | 0  1 (50)  0  0  1 (50)  2 (100)  0 | 0  0  0  0  2 (100)a  0  0 |
| Equipment  Feeding equipment  Oxygen equipment  Sensory toys  Suctioning equipment  Wheelchair  Otherd | 10 (100)  6 (60)  9 (90)  8 (80)  10(100)  1 (10) | 3 (100)  1 (33)  3 (100)  3 (100)  3 (100)  0 | 0  0  0  0  0  0 | 0  0  0  0  0  0 |

a Patient went into a nursing home not long after diagnosis as they deteriorated quite quickly.

b In one case, no adaptations were made as parent’s knew that child’s life was limited; in another case, parents were in the process of looking into adaptations.

c Garden adaptation.

d Includes equipment such as: SATs monitor, different seating, profiling bed, and bath aids.

**Supplementary Table 6. Overall symptom burden: Late infantile and early juvenile gene therapy.**

| **Overall symptom burden**  **Frequency, n (%)** | **Late infantile**  **(N=3)** | **Early juvenile**  **(N=3)** |
| --- | --- | --- |
| Mobility  Wheelchair dependent or immobile  Walking with aids  Some issues with walking  No mobility issues | 0  1 (33)  1 (33)  1 (33) | 2 (67)  0  0  1 (33) |
| Learning  Unable to attend school  Attend specialist school  Attend specialist school outreach  Home-schooled  Mainstream school | 0  0  0  0  3 (100) | 0  2 (67)  0  0  1 (33) |
| Speech and communication  Lost all communication  Lost ability to speak  Speech deterioration  No speech issues reported | 0  0  0  3 (100) | 0  0  2 (67)  1 (33) |
| Musculoskeletal  Dystonia  Hip subluxation or dislocation  Hypotonia  Scoliosis  Spasticity or hypertonia  No musculoskeletal issues | 0  0  0  0  0  3 | 0  1 (33)  3 (100)  1 (33)  1 (33)  0 |
| Eyesight and hearing  Blindness  Vision difficulties  Deafness  No issues with hearing or eyesight | 0  0  0  3 | 0  1 (33)  0  2 (67) |
| Neurological symptoms  Anxiety or panic  Temperature dysregulation  Peripheral neuropathy  Seizuresa  Sensory processing issues  Sleep disturbance  Uncontrollable crying  No neurological symptoms | 0  0  1 (33)  0  1 (33)  0  0  2 (67) | 1 (33)b  2 (67)b  1 (33)c  1 (33)c  2 (67)b  1 (33)b  2 (67)b  1 (33) |
| Nutrition and eating  Fed by nasogastric tube  Fed by gastronomy tube  Gall bladder issues | 0  0  0 | 0  0  0 |
| Chest and respiratory symptoms  Aspiration  Excess secretionsd  Frequent chest infections  Frequent colds or runny nose  Ventilation (CPAP or BI PAP) | 0  0  0  0  0 | 0  0  0  0  0 |
| Bowels and bladder  Constipation  Urinary retention  Urinary and bowel incontinence  Urinary incontinence only  No issues with bowels or bladder | 0  0  0  0  3 (100) | 1 (33)  0  2 (67)  0  1 (33) |

*CPAP: continuous positive airway pressure; BI PAP: Bilevel Positive Airway Pressure.*

a Suffering from seizures or are on anti-seizure medication.

b Symptom onset before treatment.

c Symptom onset after treatment.

d Suffering from excess secretions or are on anti-secretion medication.
